# Supplementary material
Source: PubMed Central journal article supplement (PMC2602882)

Transfected GFP

F-actin

Neph1

ZO-1

A

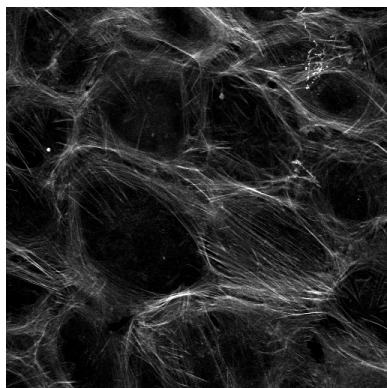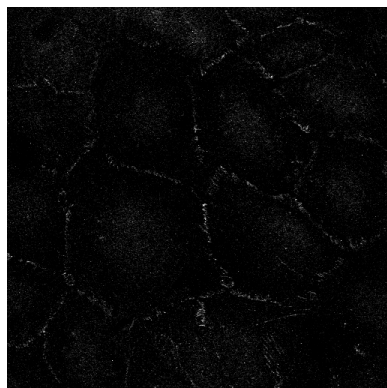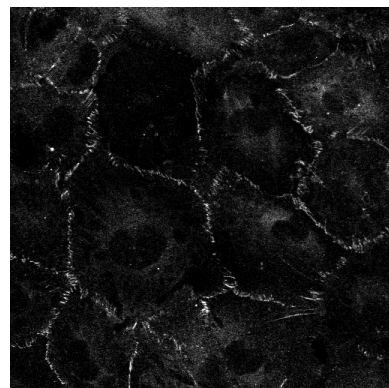

B

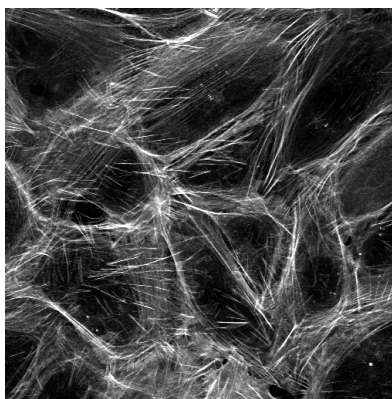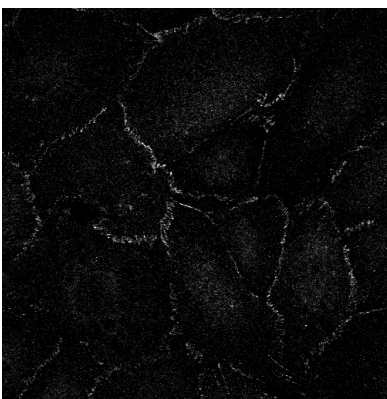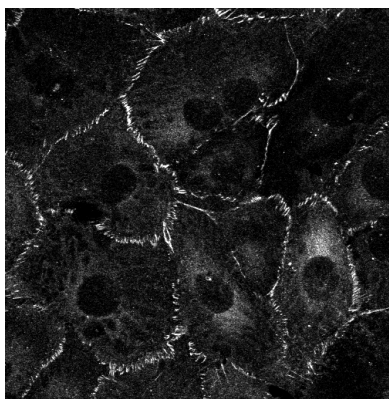

Transfected Neph1 siRNA

F-actin

Neph1

ZO-1

C

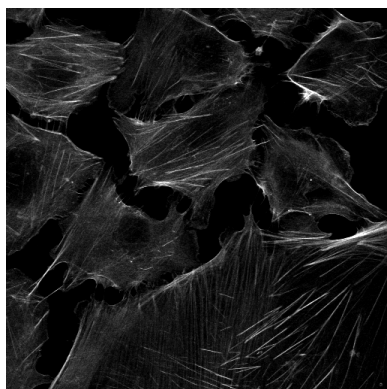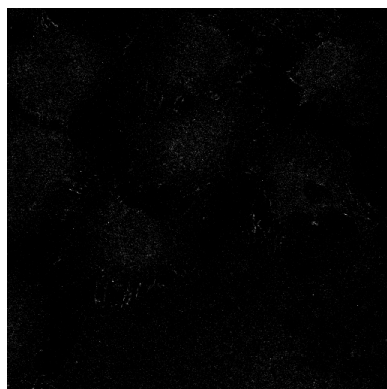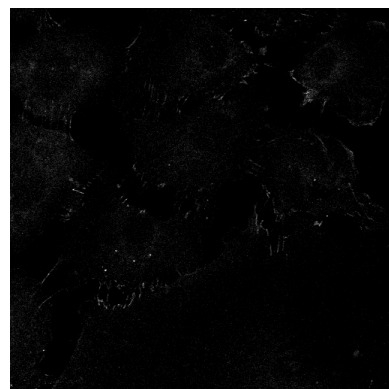

D

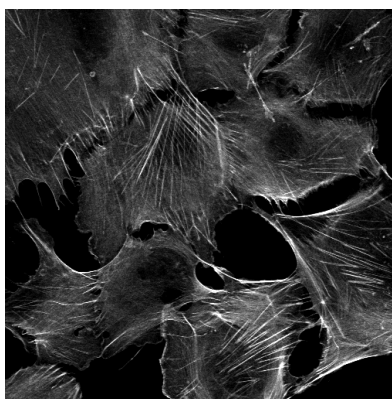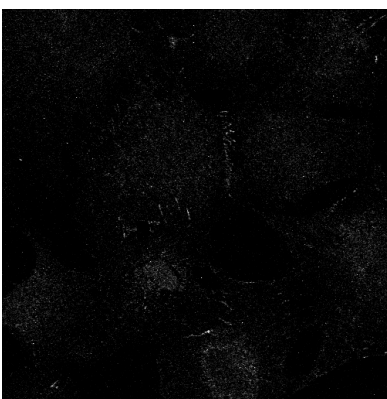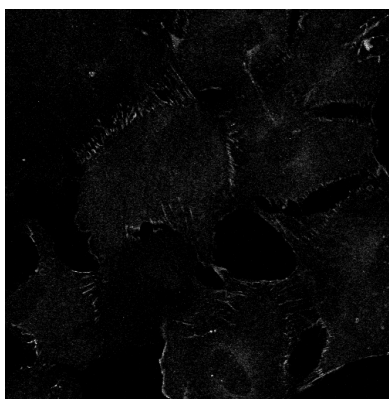

Supplemental Fig 1

Supplement: M805507200_2.pdf [file M805507200_2.pdf]
